# Supplementary material for: MgO-template synthesis of hollow N/O dual-doped carbon boxes as extremely stable anodes for potassium-ion batteries
Source: Royal Society of Chemistry journal article supplement (doi:10.1039/d2ta05082j), 2022-01-01
Supplement: d2ta05082j1.pdf [file d2ta05082j1.pdf]

## Supporting Information

### **MgO-template Synthesis of Hollow N/O Dual Doped Carbon Boxes as Extremely Stable Anode for Potassium Ion Batteries**

Jianding Li<sup>a, #, \*</sup>, Yun Zheng<sup>b, #</sup>, Wei Chen<sup>c</sup>, Wenshuai Zhu<sup>a</sup>, Yongyang Zhu<sup>d, \*</sup>, Huajun Zhao<sup>b</sup>, Xiaozhi Bao<sup>b</sup>, Liqing He<sup>e, \*</sup>, Linfeng Zhang<sup>f, \*</sup>

<sup>a</sup> Huzhou Key Laboratory of Materials for Energy Conversion and Storage, School of Science, Huzhou University, Huzhou 313000, China

<sup>b</sup> Guangdong-Hong Kong-Macau Joint Laboratory for Photonic-Thermal-Electrical Energy Materials and Devices, Institute of Applied Physics and Materials Engineering, University of Macau, Avenida da Universidade, Taipa, Macao SAR 999078, China

<sup>c</sup> School of Pharmaceutical Engineering, Xinyang Agriculture and Forestry University, Xinyang 464000, China

<sup>d</sup> Institute of Resources Utilization and Rare Earth Development, Key Laboratory of Separation and Comprehensive Utilization of Rare Metals, Guangdong Provincial Key Laboratory of Rare Earth Development and Application, Guangdong Academy of Sciences, Guangzhou 510650, China

<sup>e</sup> Hefei General Machinery Research Institute Co., Ltd, Hefei 230031, China

<sup>f</sup> School of Chemical Engineering and Pharmacy, Wuhan Institute of Technology, Wuhan 430205, China

# Equally contributing first author.

\* Corresponding author:

E-mail addresses: [jiandingli@zjhu.edu.cn](mailto:jiandingli@zjhu.edu.cn) (J. Li)

[yongyangzhu2016@163.com](mailto:yongyangzhu2016@163.com) (Y. Zhu)

[heli\\_limao@163.com](mailto:heli_limao@163.com) (L. He)

[lfzhang@wit.edu.cn](mailto:lfzhang@wit.edu.cn) (L. Zhang)

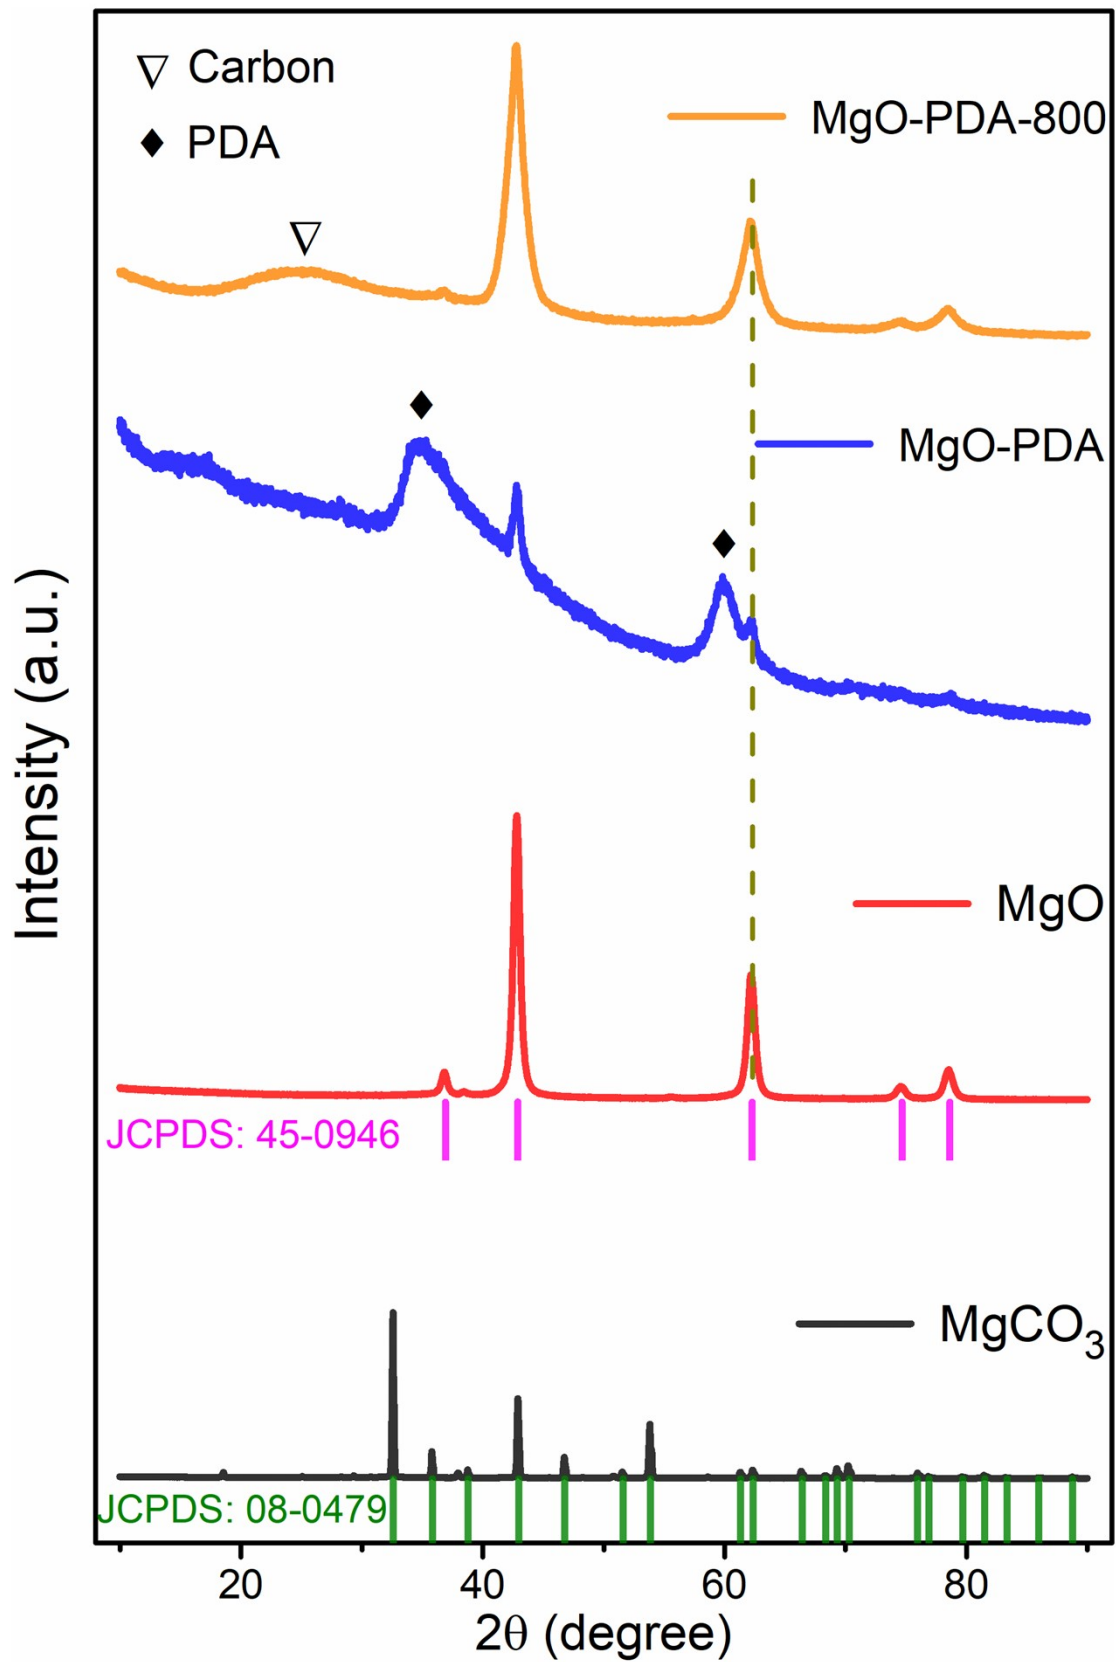

Fig. S1. XRD pattern of MgCO<sub>3</sub>, MgO, MgO-PDA and MgO-PDA-800.

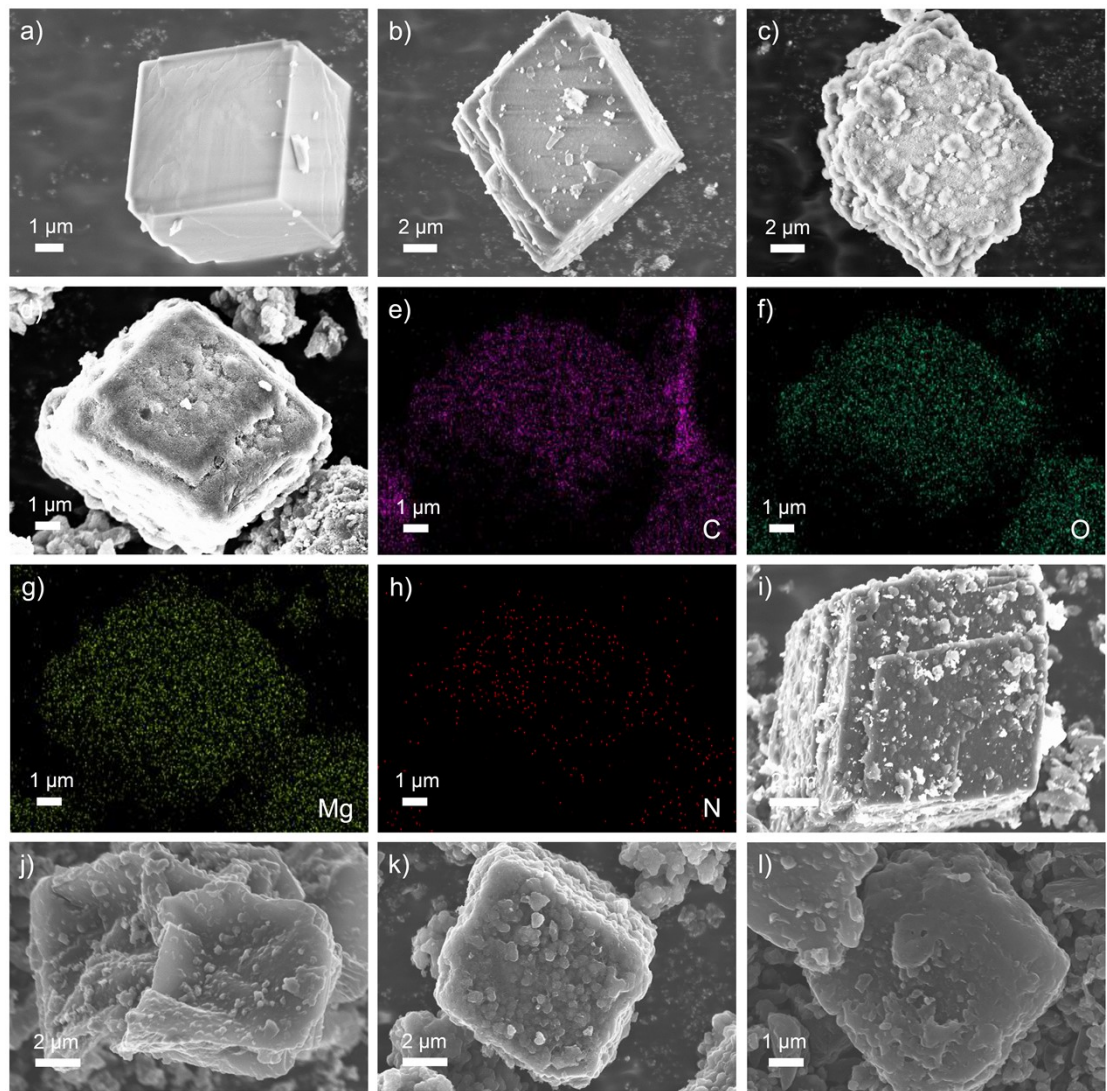

**Fig. S2.** SEM images of MgCO<sub>3</sub> (a), MgO (b), MgO-PDA (c); SEM images (d, i) and corresponding element mappings (e-h) of MgO-PDA-800; SEM images of H-NOCBs (j-l).

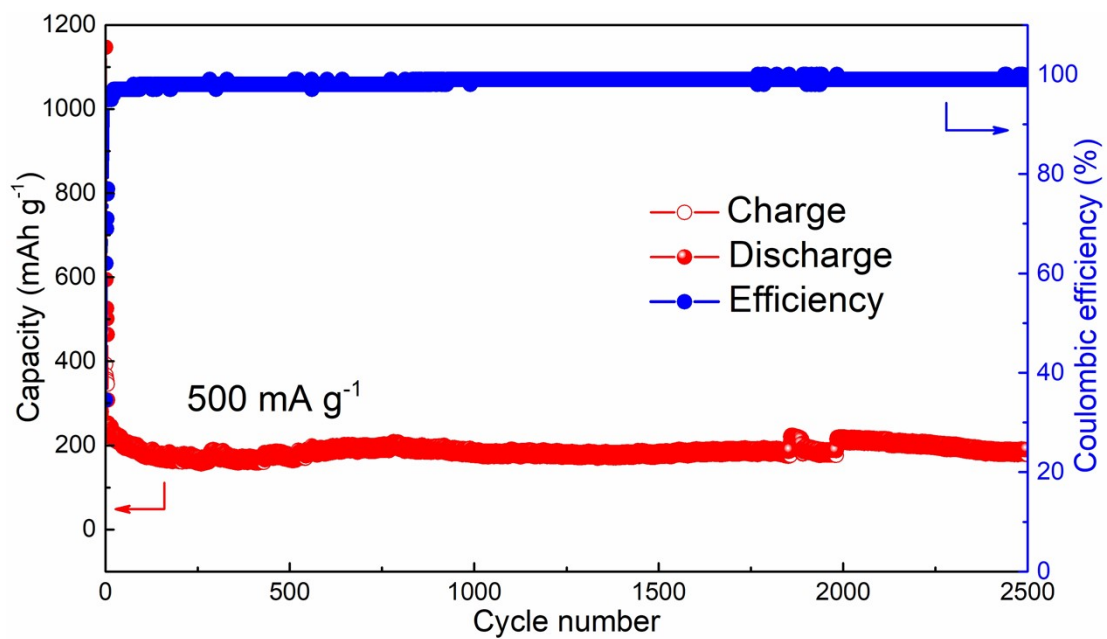

**Fig. S3.** Long-term cyclic stability of H-NOCBs at 500 mA g<sup>-1</sup> for 2500 cycles.

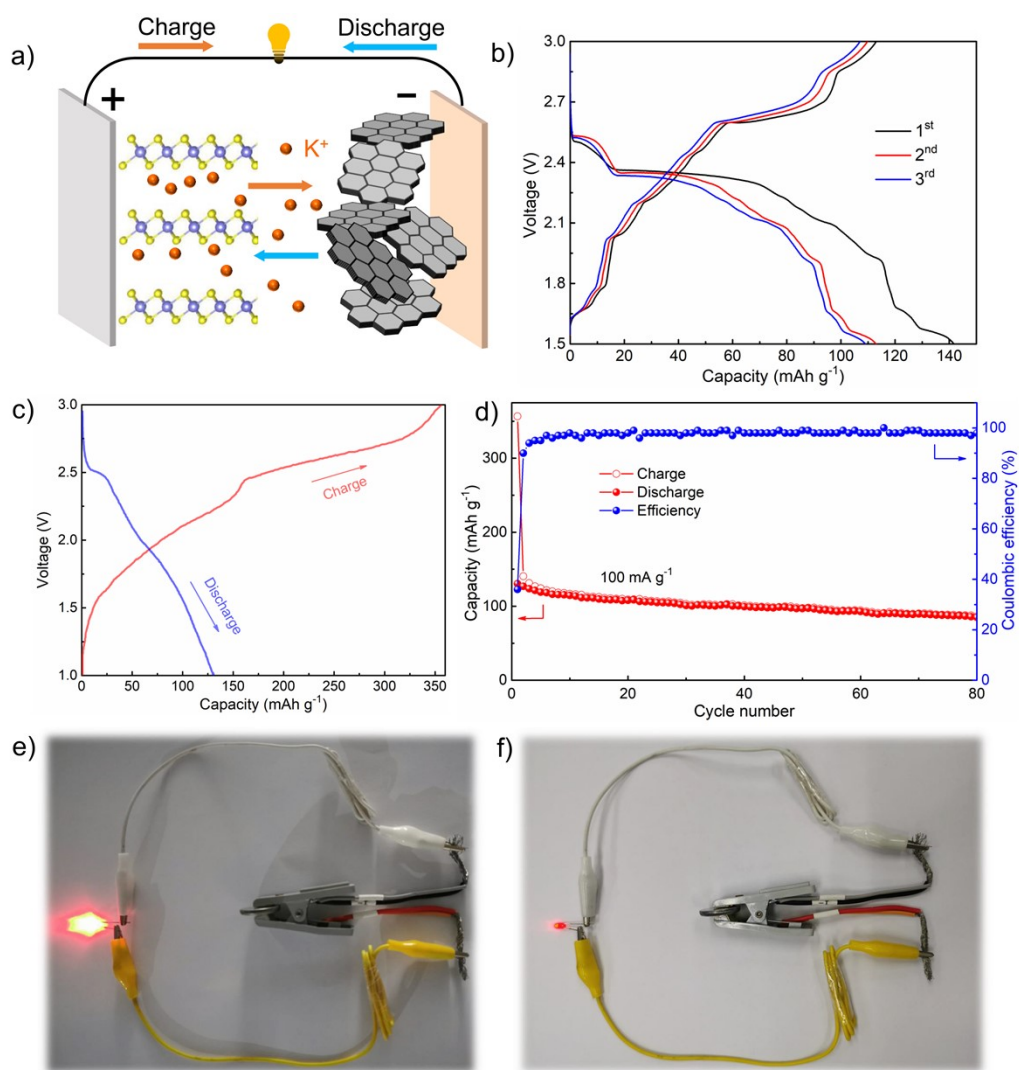

**Fig. S4.** a) Schematic illustration of the full cell employing H-NOCBs as the anode and TiS<sub>2</sub> as the cathode; b) initial three charge/discharge curves of TiS<sub>2</sub> as cathodes in a half cell at 100 mA g<sup>-1</sup>; c-d) initial charge/discharge profile and cyclic stability of full cell at 100 mA g<sup>-1</sup>; e-f) Photograph of an LED powered by the TiS<sub>2</sub>/H-NOCBs full cell.

**Table S1.** Comparison of potassium ion storage capabilities of carbon-based anodes reported recently.

| Materials                                               | Current density (A g <sup>-1</sup> ) | Cycle number | Capacity (mAh g <sup>-1</sup> ) | Reference |
|---------------------------------------------------------|--------------------------------------|--------------|---------------------------------|-----------|
| H-NOCBs                                                 | 0.5                                  | 2500         | 178.8                           | This work |
|                                                         | 1                                    | 3000         | 167.8                           |           |
|                                                         | 1                                    | 5000         | 123.7                           |           |
|                                                         | 1                                    | 10000        | 123.3                           |           |
| Amorphous ordered mesoporous carbon                     | 1                                    | 1000         | 146.5                           | [1]       |
| oxygen-rich carbon microspheres                         | 0.279                                | 900          | 192.7                           | [2]       |
| Biomorphic N-doped carbon                               | 1                                    | 1000         | 119.9                           | [3]       |
| N/O dual-doped hard carbon                              | 1                                    | 5000         | 189.5                           | [4]       |
| Honeycomb-like nitrogen-doped carbon                    | 1                                    | 2000         | 143.0                           | [5]       |
| S/N co-doping graphene nanosheets                       | 1                                    | 2000         | 188.8                           | [6]       |
| Nitrogen doped soft carbon frameworks                   | 1                                    | 500          | 165                             | [7]       |
| Nitrogen/oxygen co-doped graphene-like carbon nanocages | 0.5                                  | 300          | 131                             | [8]       |
| Nano-size porous carbon spheres                         | 1                                    | 1500         | 165.2                           | [9]       |
| Few-layer nitrogen-doped graphene                       | 0.5                                  | 500          | 150.0                           | [10]      |
| N-doped necklace-like hollow carbon                     | 1                                    | 1600         | 161.3                           | [11]      |
| N-doped hollow carbon nanosphere                        | 1                                    | 2500         | 154                             | [12]      |
| N-doped carbon nanofibers                               | 1                                    | 2000         | 164                             | [13]      |
|                                                         | 2                                    | 4000         | 146                             |           |
| Mesoporous carbon                                       | 1                                    | 2000         | 178                             | [14]      |
| Nitrogen-doped mesoporous carbon spheres                | 1                                    | 3600         | 113.9                           | [15]      |
| hollow N-doped carbon                                   | 1                                    | 800          | 160                             | [16]      |
| Three-dimensional carbonaceous material                 | 1                                    | 2000         | 161.7                           | [17]      |
| F and N codoped carbon nanosheets                       | 5                                    | 4000         | 131                             | [18]      |
| N/O co-doped mesoporous carbon octahedrons              | 1                                    | 1300         | 100                             | [19]      |

## References

- [1] W. Wang, J. Zhou, Z. Wang, L. Zhao, P. Li, Y. Yang, C. Yang, H. Huang, S. Guo, *Advanced Energy Materials*, 2018, **8**, 1701648.
- [2] W. Xiong, J. Zhang, Y. Xiao, Y. Zhu, Z. Wang, Z. Lu, *Chemical Communication*, 2020, **56**, 3433.
- [3] C. Gao, Q. Wang, S. Luo, Z. Wang, Y. Zhang, Y. Liu, A. Hao, R. Guo, *Journal of Power Sources*, 2019, **415**, 165.
- [4] R.C. Cui, B. Xu, H.J. Dong, C.C. Yang, Q. Jiang, *Advanced Science*, 2020, **7**, 1902547.
- [5] J. Li, Y. Li, X. Ma, K. Zhang, J. Hu, C. Yang, M. Liu, *Chemical Engineering Journal*, 2020, **384**, 123328.
- [6] W. Yang, J. Zhou, S. Wang, Z. Wang, F. Lv, W. Zhang, W. Zhang, Q. Sun, S. Guo, *ACS Energy Letters*, 2020, **5**, 1653.
- [7] C. Liu, N. Xiao, H. Li, Q. Dong, Y. Wang, H. Li, S. Wang, X. Zhang, J. Qiu, *Chemical Engineering Journal*, 2020, **382**, 121759.
- [8] Y. Sun, D. Zhu, Z. Liang, Y. Zhao, W. Tian, X. Ren, J. Wang, X. Li, Y. Gao, W. Wen, Y. Huang, X. Li, R. Tai, *Carbon*, 2020, **167**, 685.
- [9] H. Zhang, C. Luo, H. He, H.H. Wu, L. Zhang, Q. Zhang, H. Wang, M.S. Wang, *Nanoscale Horizons*, 2020, **5**, 895.
- [10] Z. Ju, P. Li, G. Ma, Z. Xing, Q. Zhuang, Y. Qian, *Energy Storage Materials*, 2018, **11**, 38.
- [11] W. Yang, J. Zhou, S. Wang, W. Zhang, Z. Wang, F. Lv, K. Wang, Q. Sun, S. Guo, *Energy & Environmental Science*, 2019, **12**, 1605.
- [12] J. Ruan, X. Wu, Y. Wang, S. Zheng, D. Sun, Y. Song, M. Chen, *Journal of Materials Chemistry A*, 2019, **7**, 19305.
- [13] Y. Xu, C. Zhang, M. Zhou, Q. Fu, C. Zhao, M. Wu, Y. Lei, *Nature Communications*, 2018, **9**, 1720.
- [14] H. Tan, X. Du, R. Zhou, Z. Hou, B. Zhang, *Carbon*, 2021, **176**, 383.
- [15] J. Zheng, Y. Wu, Y. Tong, X. Liu, Y. Sun, H. Li, L. Niu, *Nanomicro Lett*, 2021, **13**, 174.
- [16] W. Hong, Y. Zhang, L. Yang, Y. Tian, P. Ge, J. Hu, W. Wei, G. Zou, H. Hou, X. Ji,

*Nano Energy*, 2019, **65**, 104038.

[17] J. Du, S. Gao, P. Shi, J. Fan, Q. Xu, Y. Min, *Journal of Power Sources*, 2020, **451**, 227727.

[18] Y. Jiang, Y. Yang, R. Xu, X. Cheng, H. Huang, P. Shi, Y. Yao, H. Yang, D. Li, X. Zhou, Q. Chen, Y. Feng, X. Rui, Y. Yu, *ACS Nano*, 2021, **15**, 10217.

[19] G. Xia, C. Wang, P. Jiang, J. Lu, J. Diao, Q. Chen, *Journal of Materials Chemistry A*, 2019, **7**, 12317.
